# Supplementary material
Source: publisher figshare collection journal article supplement (https://frontiersin.figshare.com/ndownloader/files/14392904)
Supplement: Supplementary file [file 14392904]

## Supp. Fig.S2

|          | si.Ct |      | si.CLE |      |
|----------|-------|------|--------|------|
|          | Cyt.  | Nuc. | Cyt.   | Nuc. |
| Sample 1 | 4.7   | 4.4  | 4.7    | 4.2  |
| Sample 2 | 4.8   | 4.2  | 4.7    | 4.3  |
| Sample 3 | 4.7   | 4.5  | 4.7    | 4.3  |

**Supp. Fig. S2. Silencing of hCLE does not affect RNA stability.** Equal amounts of control (si.Ct) or hCLE silenced (si.CLE) HEK293T cells were used for separation of nuclear (Nuc.) and cytoplasmic (Cyt.) RNA and used for dot-blot assay using Poly-thimidine probes labelled with <sup>32</sup>P. Nuclear and cytoplasmic RNAs were quantified in a phosphorimager device. Obtained quantification of absolute numbers is shown (arbitrary units).
